# Supplementary material
Source: MDPI journal article supplement (https://www.mdpi.com/2079-6412/13/8/1418)
Supplement: s1 [file s1 › coatings-2453802-supplementary.pdf]

# Proposal of New Natural Hydraulic Lime-Based Mortars for the Conservation of Historical Buildings

Marco Destefani \*, Laura Falchi and Elisabetta Zendri

Department of Environmental Sciences, Informatics and Statistics (DAIS), Scientific Campus,  
Ca' Foscari University of Venice, 30170 Venezia, Italy; laura.falchi@unive.it (L.F.); elizen@unive.it (E.Z.)

\* Correspondence: 858827@stud.unive.it; Tel.: +39-3808965178

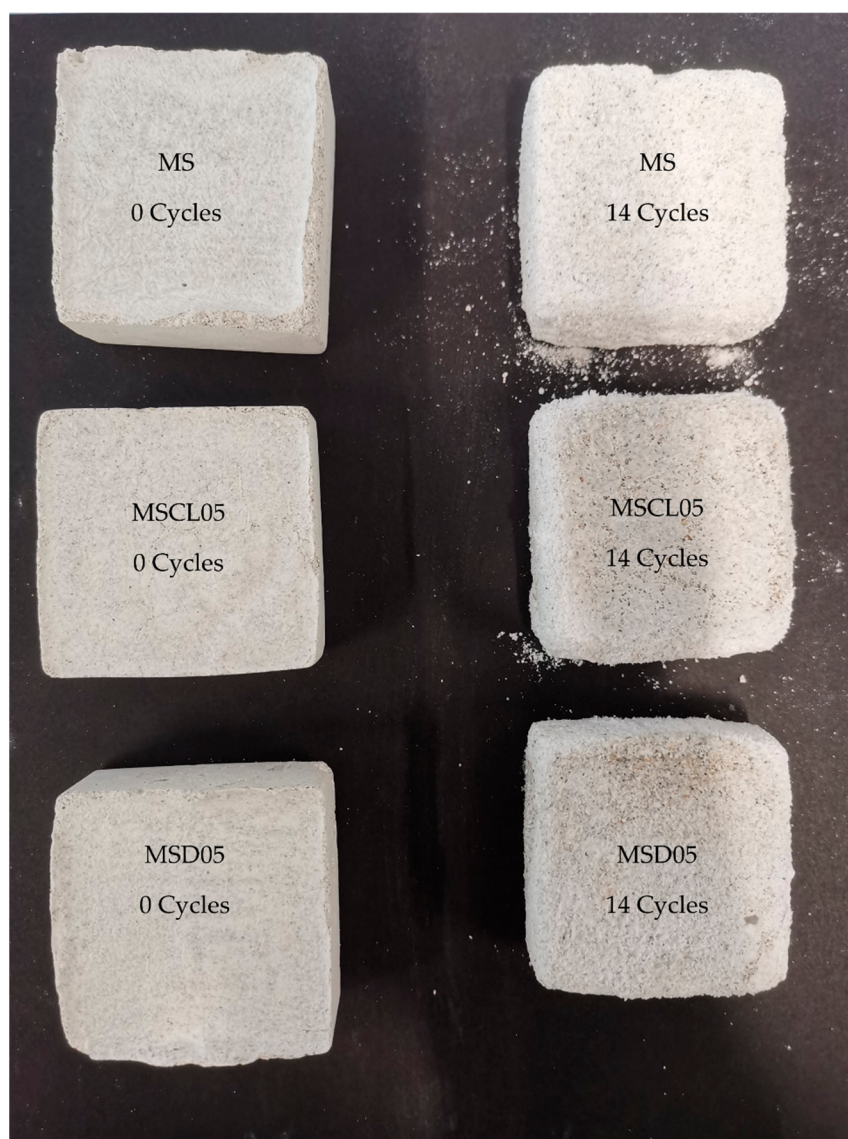

**Figure S1.** MS series samples (part 1) before (left) and after (right) 14 saline cycles.

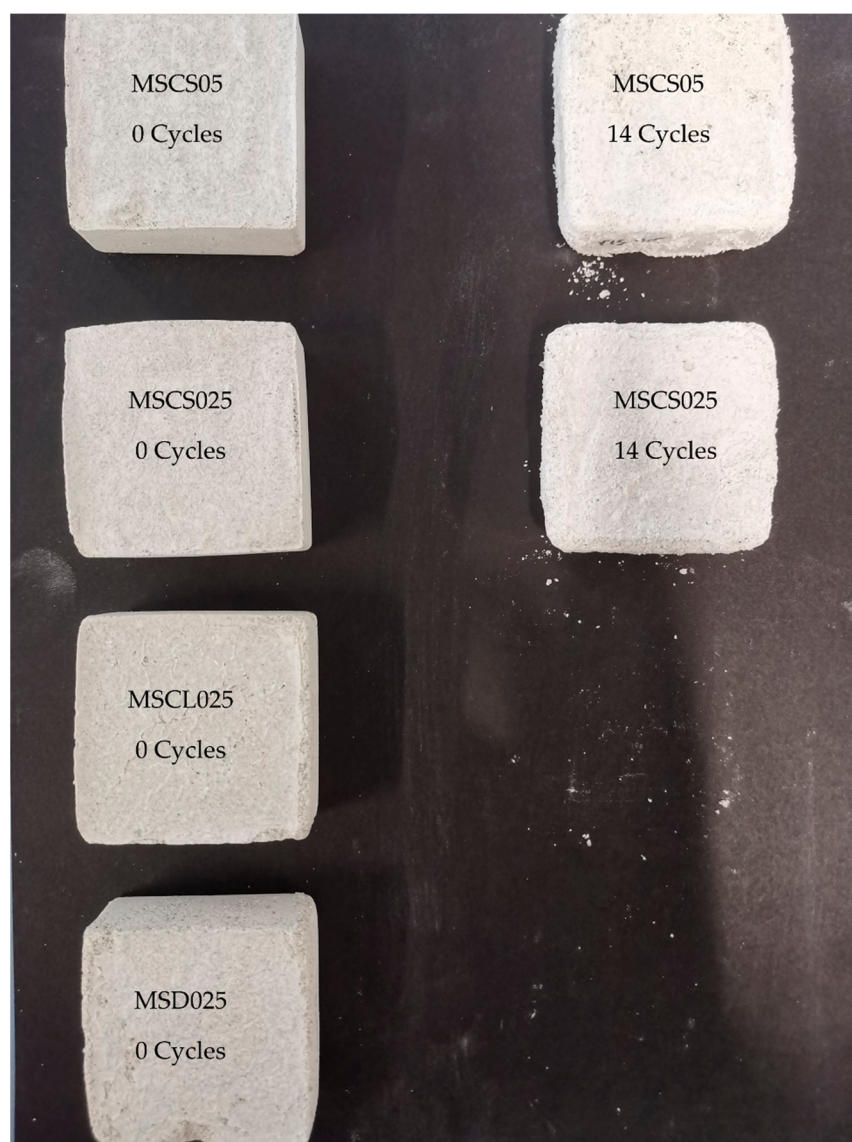

**Figure S2.** MS series (part 2) samples before (left) and after (right) 14 saline cycles.

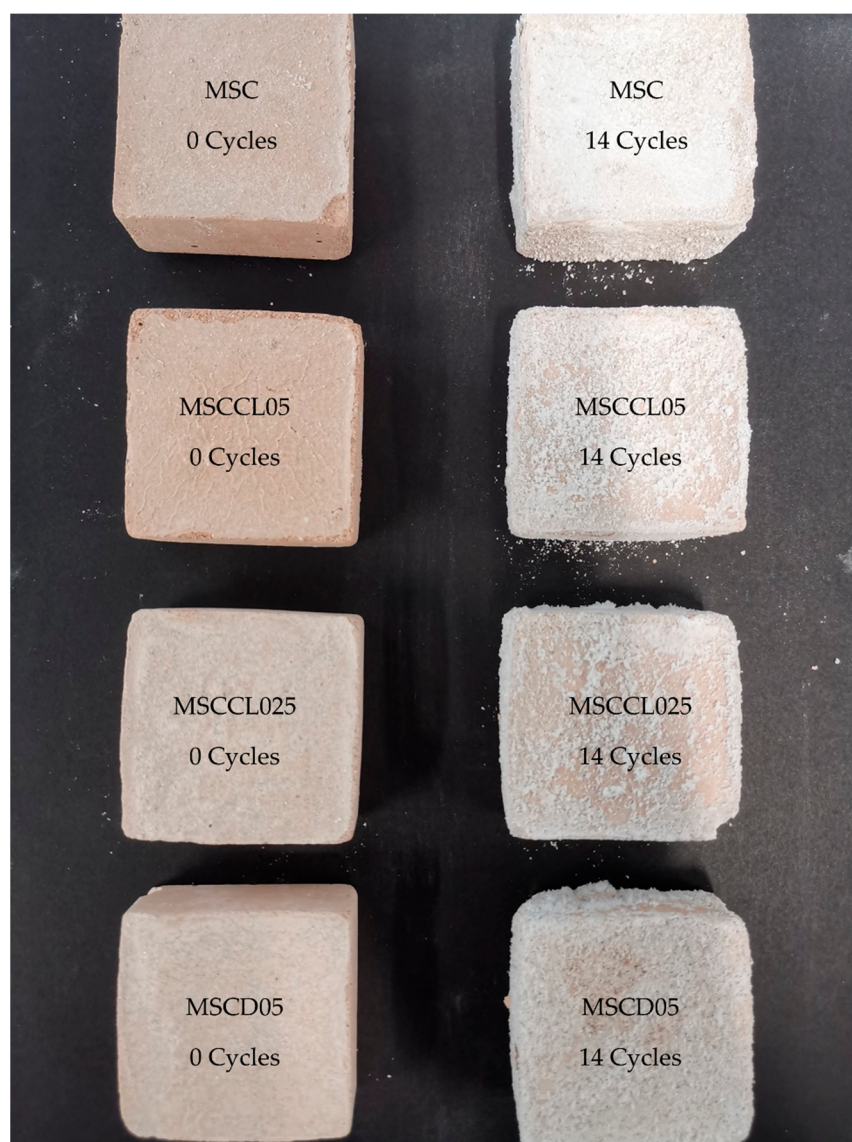

**Figure S3.** MSC series samples (part 1) before (left) and after (right) 14 saline cycles.

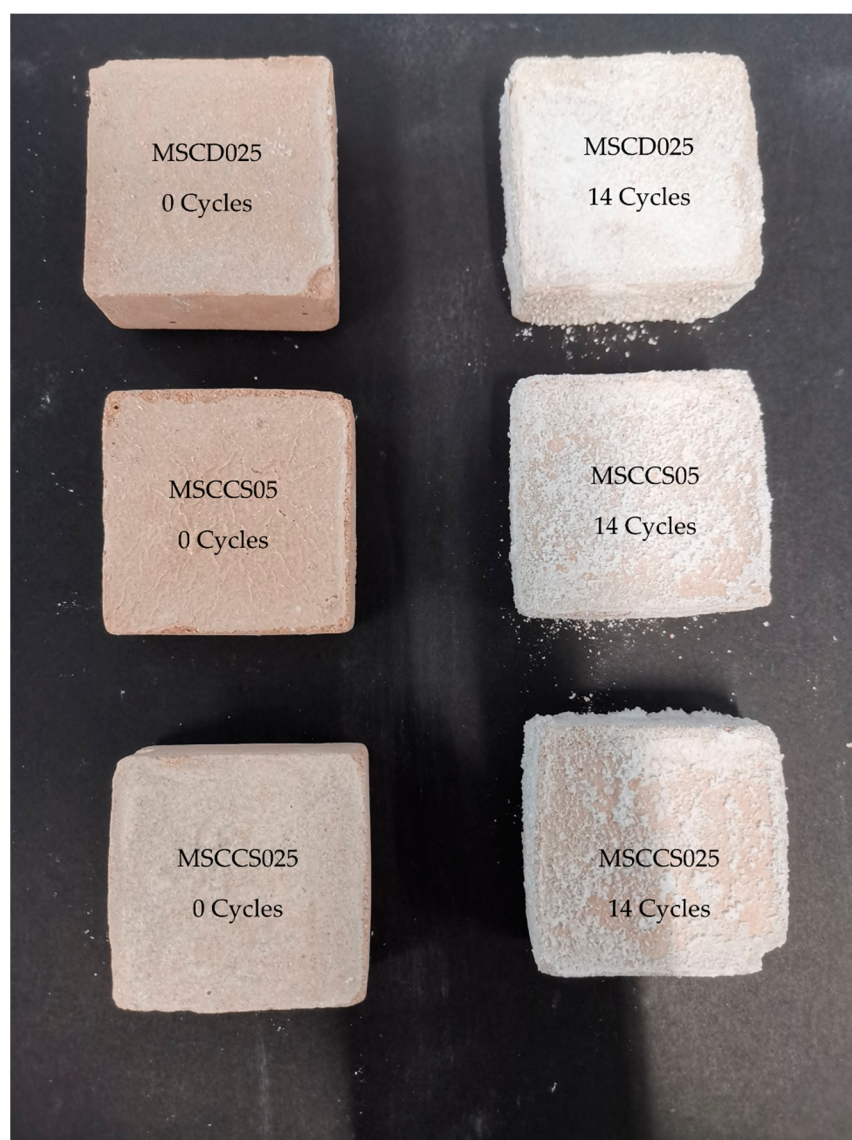

**Figure S4.** MSC series (part 2) samples before (left) and after (right) 14 saline cycles.
